# Supplementary material for: Isolation and quantification of synthetic cannabinoid receptor agonists in human urine using membrane-assisted solvent extraction followed by liquid chromatography-tandem mass spectrometry
Source: Royal Society of Chemistry journal article supplement (doi:10.1039/d2ay01491b), 2022-12-16

## Electronic supplementary information (ESI)

### Isolation and quantification of synthetic cannabinoids in human urine using membrane-assisted solvent extraction followed by liquid chromatography-tandem mass spectrometry

Cristian Suárez-Oubiña, Iván Álvarez-Freire, Pamela Cabarcos, Ana María Bermejo, Pilar Bermejo-Barrera, Antonio Moreda-Piñeiro

**Figure S1.** Chemical structures and (predicted) LogP of the synthetic cannabinoids under study.

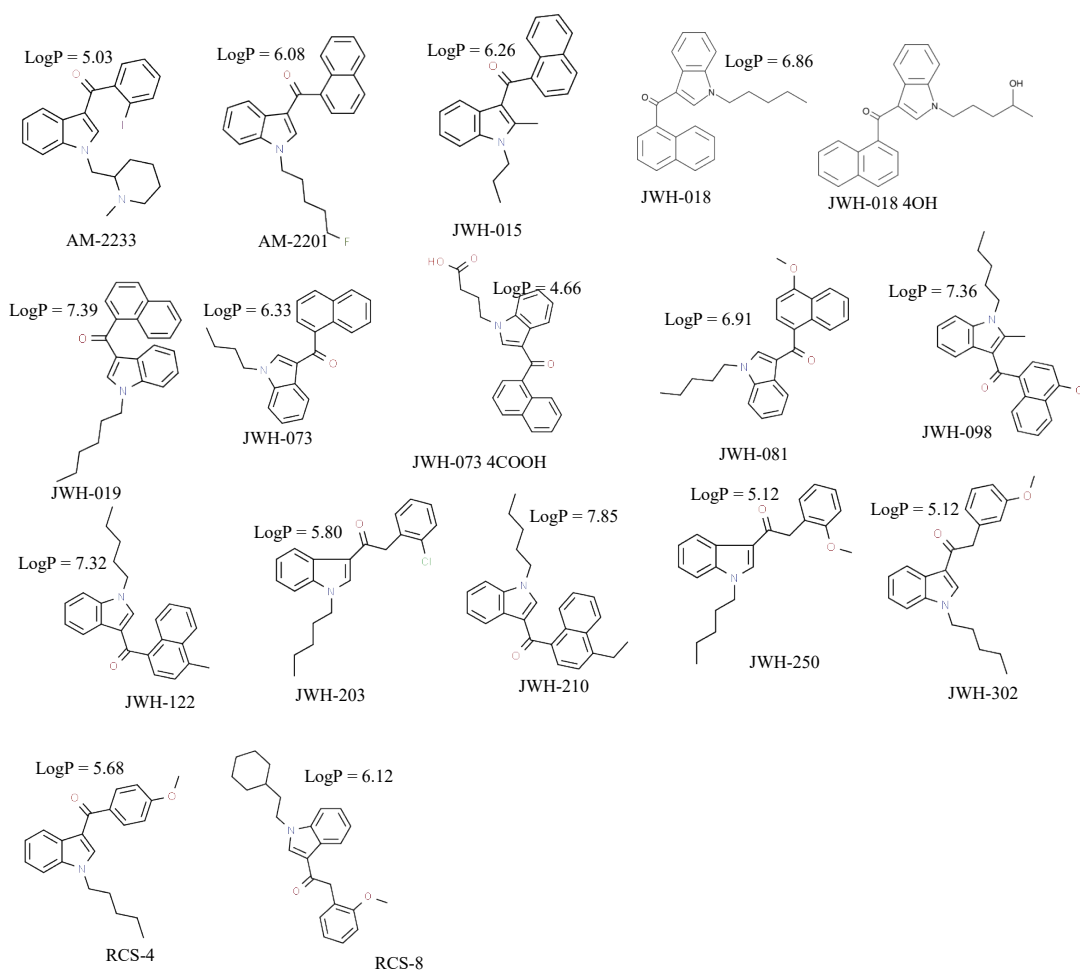

**Figure S2.** Effect of the organic solvent used as an acceptor phase on the analytical recovery of SCs from urine

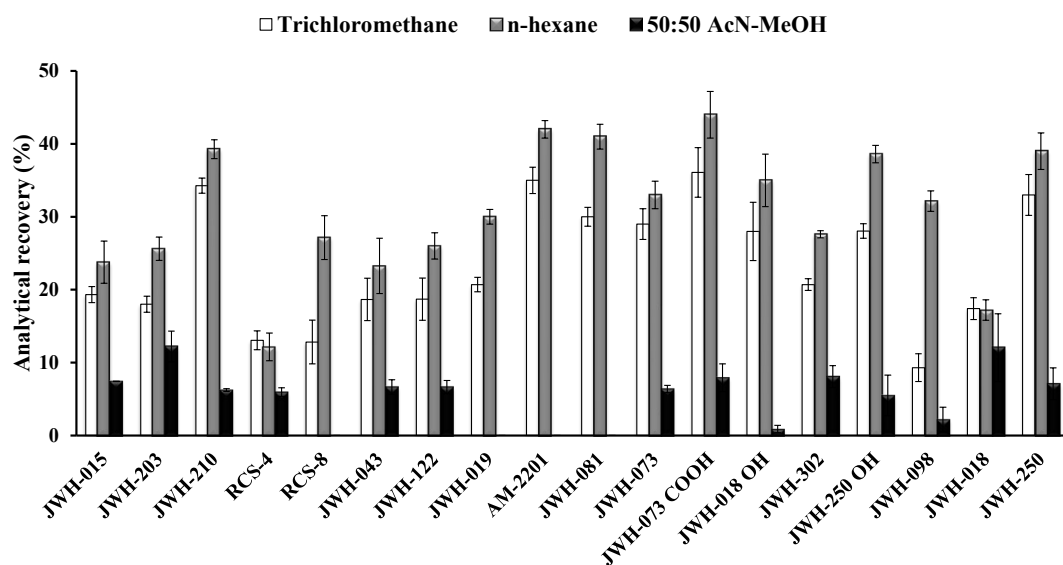

**Figure S3.** Effect of the shaking (magnetic or mechanical) on the analytical recovery of SCs from urine

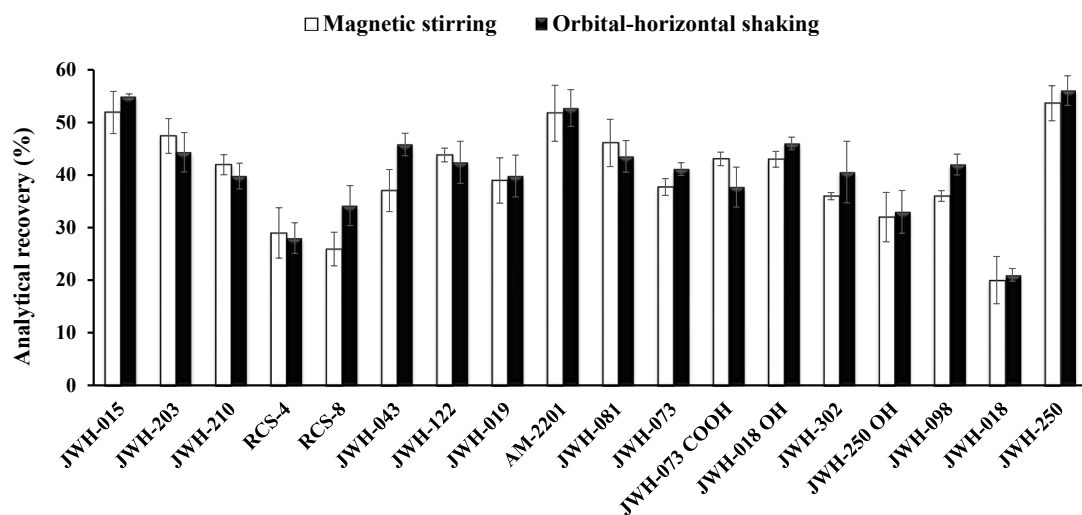

Supplement: d2ay01491b1.pdf [file d2ay01491b1.pdf]
